# Supplementary material for: Theoretical study on the effect of intramolecular hydrogen bonding on OH stretching overtone decay lifetime of ethylene glycol, 1,3-propanediol, and 1,4-butanediol
Source: Royal Society of Chemistry journal article supplement (doi:10.1039/c0cp00788a), 2010-01-01
Supplement: c0cp00788a.pdf [file c0cp00788a.pdf]

**Supplementary Material for**  
**Theoretical Study on the Effect of Intramolecular**  
**Hydrogen Bonding on OH Stretching Overtone Decay**  
**Lifetime of Ethylene Glycol, 1-3 Propanediol, and 1-4**  
**Butanediol**

**Kaito Takahashi**

*Institute of Atomic and Molecular Sciences, Academia Sinica,  
P. O. Box 23-166, Taipei, 10617, Taiwan R.O.C.*

Kaito Takahashi

Tel: +886-2-2366-8237

Fax: +886-2-2366-0200

Email: kt@gate.sinica.edu.tw

Tables for Supplementary Material

Table S1: The optimized OH<sub>b</sub> bond length, in Angstrom, for BD by M06 and M062X methods using different basis sets along with the results previously reported using QCISD/6-311++G(2d,dp) in ref 13

| Method | Basis             | ROH <sub>b</sub> |
|--------|-------------------|------------------|
| M06    | 6-31+G(d,p)       | 0.9713           |
| M06    | 6-311+G(2d,p)     | 0.9673           |
| M06    | 6-311+G(2df,2p)   | 0.9660           |
| M06    | 6-311++G(3df,3pd) | 0.9667           |
| M06    | aug-cc-PVTZ       | 0.9668           |
| M06    | maug-cc-PV(T+D)Z  | 0.9669           |
| M062X  | 6-31+G(d,p)       | 0.9688           |
| M062X  | 6-311+G(2d,p)     | 0.9673           |
| M062X  | 6-311+G(2df,2p)   | <u>0.9639</u>    |
| M062X  | 6-311++G(3df,3pd) | 0.9645           |
| M062X  | aug-cc-PVTZ       | 0.9668           |
| M062X  | maug-cc-PV(T+D)Z  | 0.9655           |
| QCISD  | 6-311++(2d,2p)    | <u>0.9616</u>    |

From the comparison of calculated length versus the QCISD results from Ref 13, we selected M062X/6-311+G(2df,2p) as the method to use for the present study for different alkane diols.

Table S2 : The optimized hydrogen bonding distance H...O, in angstrom, and OH...O angle, in degree, for the lowest energy conformers of EG, PD, BD

|      | MP2/6-311++G(3df,3pd) |         | M062X/6-311+G(2df,2p) |         | MPw1PW91/6-311+G(2d,p) |         |
|------|-----------------------|---------|-----------------------|---------|------------------------|---------|
|      | RH...O                | AOH...O | RH...O                | AOH...O | RH...O                 | AOH...O |
| EG 1 | 2.33                  | 108     | 2.33                  | 107     | 2.34                   | 108     |
| PD 1 | 2.00                  | 139     | 2.03                  | 136     | 2.02                   | 139     |
| BD 1 | 1.84                  | 156     | 1.90                  | 151     | 1.85                   | 157     |

Table S3: The calculated integrated absorption coefficient, in km mol<sup>-1</sup>, for OH<sub>b</sub> and OH<sub>f</sub> transitions for the two stable conformers for ethylene glycol, propane diol and butane diol, calculated using the B3LYP/6-31+G(d,p) method with the local mode

approximation. The two columns in the right hand side give the ratio between the  $\text{OH}_b$  versus  $\text{OH}_f$  intensities.

| Ethylene Glycol         |          |          |          |          |       |       |
|-------------------------|----------|----------|----------|----------|-------|-------|
| $\Delta\nu_{\text{OH}}$ | 1b       | 1f       | 2b       | 2f       | 1b/1f | 2b/2f |
| 1                       | 30.90    | 24.83    | 32.85    | 17.41    | 1.24  | 1.89  |
| 2                       | 2.74     | 4.10     | 2.67     | 3.30     | 0.67  | 0.81  |
| 3                       | 1.89E-01 | 2.76E-01 | 1.90E-01 | 2.39E-01 | 0.69  | 0.80  |
| 4                       | 1.64E-02 | 2.22E-02 | 1.65E-02 | 1.99E-02 | 0.74  | 0.83  |
| 5                       | 1.94E-03 | 2.38E-03 | 1.86E-03 | 2.19E-03 | 0.81  | 0.85  |
| Propanediol             |          |          |          |          |       |       |
| $\Delta\nu_{\text{OH}}$ | 1b       | 1f       | 2b       | 2f       | 1b/1f | 2b/2f |
| 1                       | 125.53   | 22.12    | 116.72   | 23.24    | 5.68  | 5.02  |
| 2                       | 1.58     | 4.34     | 1.56     | 3.29     | 0.37  | 0.48  |
| 3                       | 1.37E-01 | 2.87E-01 | 1.40E-01 | 2.27E-01 | 0.48  | 0.62  |
| 4                       | 1.51E-02 | 2.25E-02 | 1.59E-02 | 1.86E-02 | 0.67  | 0.86  |
| 5                       | 1.90E-03 | 2.38E-03 | 2.05E-03 | 2.03E-03 | 0.80  | 1.01  |
| Butanediol              |          |          |          |          |       |       |
| $\Delta\nu_{\text{OH}}$ | 1b       | 1f       | 2b       | 2f       | 1b/1f | 2b/2f |
| 1                       | 351.99   | 27.12    | 341.74   | 21.29    | 12.98 | 16.05 |
| 2                       | 0.70     | 4.35     | 0.76     | 3.18     | 0.16  | 0.24  |
| 3                       | 7.52E-02 | 2.78E-01 | 8.61E-02 | 4.20E-01 | 0.27  | 0.21  |
| 4                       | 1.40E-02 | 2.16E-02 | 1.58E-02 | 1.70E-01 | 0.65  | 0.09  |
| 5                       | 2.80E-03 | 2.29E-03 | 2.98E-03 | 9.41E-02 | 1.23  | 0.03  |

#### Figure Captions for Supplementary Material

Figure S1: Decay of correlation for the  $\Delta\nu_{\text{OH}}=4$  transition of the second stable conformer for (a) ethylene glycol, (b) 1-3 propanediol, and (c) 1-4 butanediol. The curves are generated using the semiclassical energy binning scheme, and the results for the hydrogen bonded (red) and free (blue) OH are presented. The best fit to an exponential decay curve is also shown as well as the resulting decay time in fs.

Figure S2: Decay of correlation for the  $\Delta\nu_{\text{OH}}=3$  transition of the most stable conformer for (a) ethylene glycol, (b) 1-3 propanediol, and (c) 1-4 butanediol. The curves are generated using the semiclassical energy binning scheme, and the results for the hydrogen bonded (red) and free (blue) OH are presented. The best fit to an exponential decay curve is also shown as well as the resulting decay time in fs.

Figure S3: Decay of correlation for the  $\Delta\nu_{\text{OH}}=4$  transition of ethanol. The curves are generated using the semiclassical energy binning scheme, and the best fit to an exponential decay curve is also shown as well as the resulting decay time in fs.

Figure S4: Time dependence of energy in the OH bonds calculated by the local mode model for the  $\Delta\nu_{\text{OH}}=4$  excitation for the  $\text{OH}_b$  in BD. NM1 is mainly  $\text{OH}_f$  stretching vibration and NM2 is mainly  $\text{OH}_b$  stretching vibration.

Figure S5: Time dependence of the energy in the 40 normal mode coordinates for the  $\Delta\nu_{\text{OH}}=4$  excitation for the  $\text{OH}_b$  in BD. Modes are numbered in decending order of frequency. Modes 3-10 mainly correspond to CH stretching vibrations, 11-28 mainly corresponds to CH and OH bend vibrations, 29-33 mainly corresponds to CH wag vibrations. 34-42 mainly corresponds to frame bending modes and OH torsion vibrations.

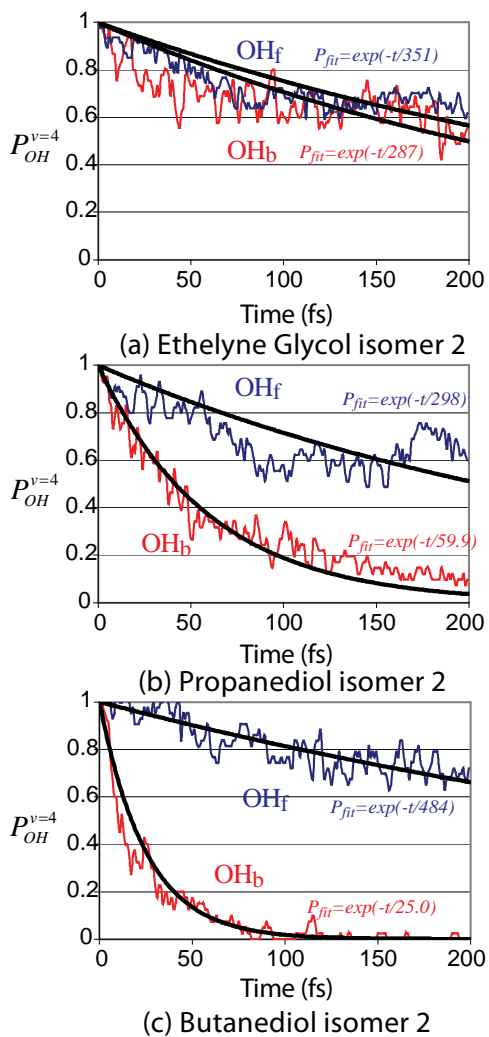

Figure S1

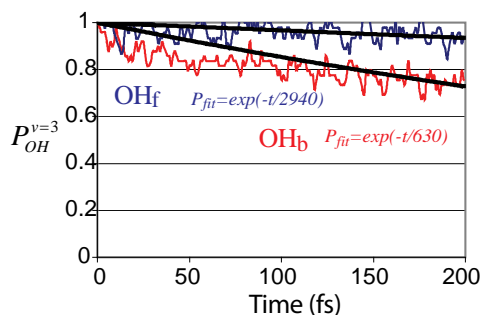

(a) Ethylene Glycol

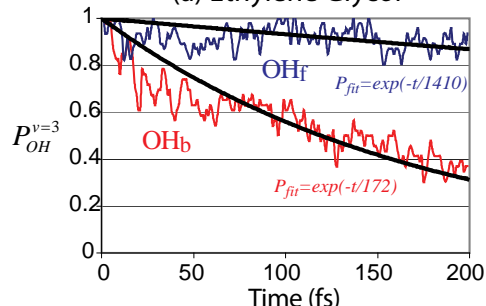

(b) Propanediol

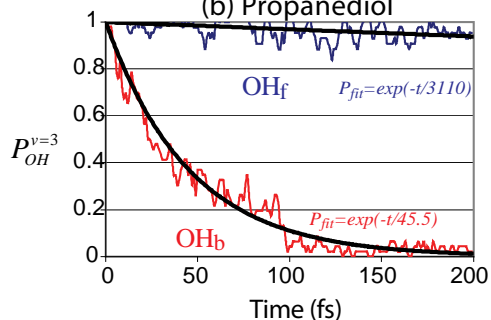

(c) Butanediol

Figure S2

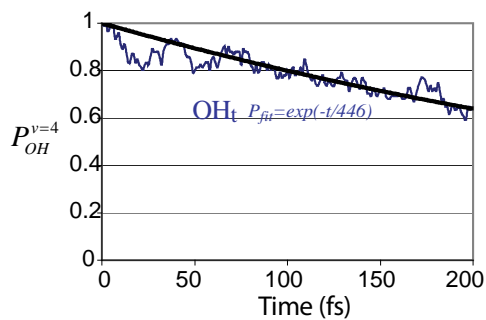

Figure S3

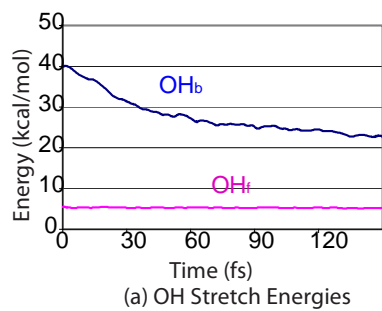

Figure S4

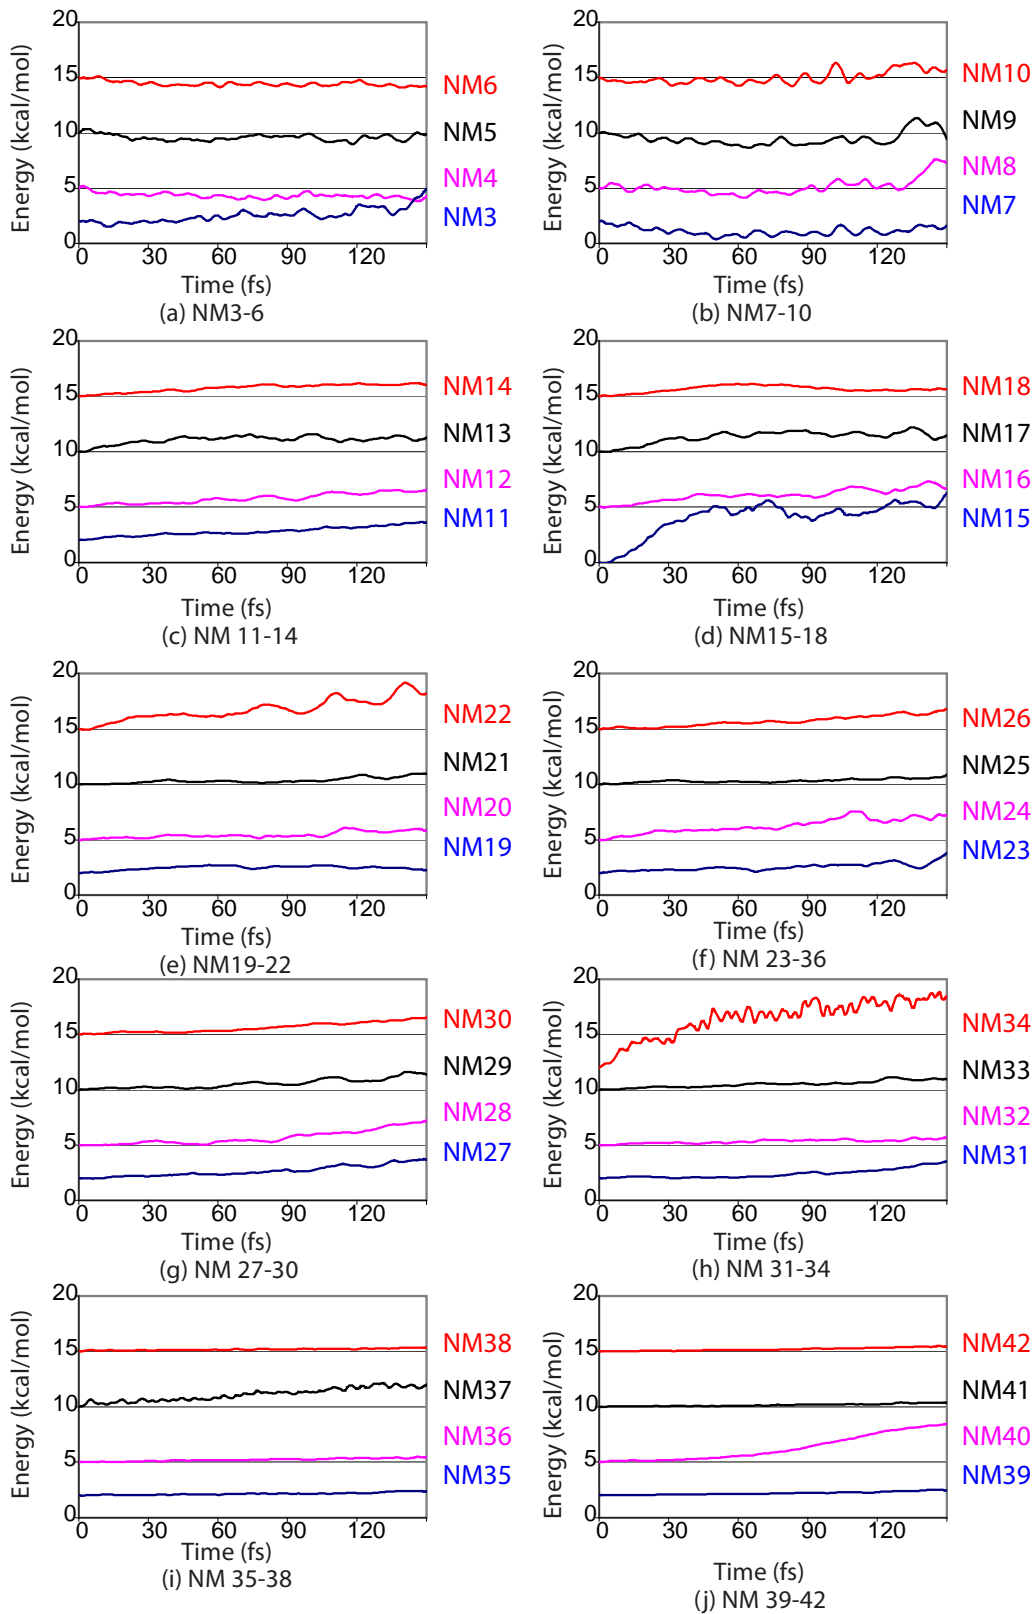

Figure S5



Optimized geometries for all the molecules calculated in the paper are given in the following in Angstrom xyz format.

Optimized Cartesian Geometries calculated by B3LYP/6-31+G(d,p)

EG1

|   |           |           |           |
|---|-----------|-----------|-----------|
| C | -0.001575 | -0.003655 | -0.006367 |
| C | -0.000608 | 0.002417  | 1.512688  |
| O | 1.372098  | -0.002787 | -0.417609 |
| O | 0.621843  | 1.167746  | 2.037520  |
| H | -0.520986 | -0.899453 | -0.377522 |
| H | -0.517534 | 0.891496  | -0.379128 |
| H | -1.029941 | 0.000168  | 1.884141  |
| H | 0.499966  | -0.907224 | 1.877627  |
| H | 1.431018  | 0.195952  | -1.359689 |
| H | 1.496348  | 1.229529  | 1.626779  |

EG2

|   |           |           |           |
|---|-----------|-----------|-----------|
| C | 0.042138  | -0.020687 | 0.040847  |
| C | -0.022439 | 0.003240  | 1.562512  |
| O | 1.400510  | 0.035038  | -0.415704 |
| O | 0.608750  | 1.158762  | 2.095050  |
| H | -0.475247 | -0.906536 | -0.354027 |
| H | -0.437640 | 0.873274  | -0.367577 |
| H | -1.065793 | 0.028048  | 1.895096  |
| H | 0.437759  | -0.913970 | 1.969265  |
| H | 1.810547  | -0.832131 | -0.297776 |
| H | 1.449815  | 1.265319  | 1.625898  |

PD1

|   |           |           |           |
|---|-----------|-----------|-----------|
| C | -0.009887 | -0.000570 | -0.010616 |
| C | 0.000269  | 0.008054  | 1.513667  |
| C | 1.407461  | -0.001862 | 2.122859  |
| O | 0.663530  | -1.188978 | -0.465639 |
| O | 2.072495  | -1.252408 | 1.988896  |

|   |           |           |           |
|---|-----------|-----------|-----------|
| H | -1.042424 | 0.012817  | -0.385965 |
| H | 0.508284  | 0.891351  | -0.393525 |
| H | -0.527824 | 0.912561  | 1.844959  |
| H | -0.561297 | -0.855394 | 1.890715  |
| H | 2.007987  | 0.808670  | 1.674785  |
| H | 1.347558  | 0.194017  | 3.198248  |
| H | 0.729402  | -1.177965 | -1.428553 |
| H | 1.955089  | -1.543289 | 1.071031  |

PD2

|   |           |           |           |
|---|-----------|-----------|-----------|
| C | 0.007130  | -0.055326 | 0.026444  |
| C | -0.001859 | 0.010348  | 1.554709  |
| C | 1.398920  | 0.016525  | 2.176873  |
| O | 0.668487  | -1.228132 | -0.483770 |
| O | 2.097820  | -1.212120 | 2.004992  |
| H | -1.014325 | 0.005594  | -0.372837 |
| H | 0.574124  | 0.785990  | -0.385850 |
| H | -0.527873 | 0.929174  | 1.851331  |
| H | -0.575608 | -0.832454 | 1.964474  |
| H | 1.981316  | 0.855267  | 1.759488  |
| H | 1.328021  | 0.174563  | 3.257548  |
| H | 0.105524  | -1.998019 | -0.326304 |
| H | 2.059693  | -1.432333 | 1.060650  |

BD1

|   |           |           |           |
|---|-----------|-----------|-----------|
| C | -0.000082 | 0.000051  | -0.000001 |
| C | 0.000003  | -0.000069 | 1.525525  |
| C | 1.369766  | 0.000009  | 2.233637  |
| C | 2.176417  | -1.304874 | 2.193828  |
| O | 0.384900  | -1.301170 | -0.486405 |
| O | 2.763491  | -1.595336 | 0.933460  |
| H | -1.009485 | 0.232177  | -0.364392 |
| H | 0.692170  | 0.763207  | -0.383071 |

|   |           |           |           |
|---|-----------|-----------|-----------|
| H | -0.541549 | 0.904376  | 1.832785  |
| H | -0.602617 | -0.851819 | 1.869707  |
| H | 1.995740  | 0.809506  | 1.833512  |
| H | 1.191151  | 0.237802  | 3.291667  |
| H | 3.011208  | -1.225697 | 2.898096  |
| H | 1.541899  | -2.141397 | 2.532174  |
| H | 0.367293  | -1.300762 | -1.452074 |
| H | 2.038724  | -1.687431 | 0.289418  |

BD2

|   |           |           |           |
|---|-----------|-----------|-----------|
| C | -0.009108 | -0.049110 | 0.028651  |
| C | -0.004032 | 0.022782  | 1.557392  |
| C | 1.370175  | 0.007682  | 2.254433  |
| C | 2.173206  | -1.299193 | 2.188709  |
| O | 0.396724  | -1.325506 | -0.501202 |
| O | 2.781248  | -1.556944 | 0.932161  |
| H | -1.007210 | 0.199389  | -0.355563 |
| H | 0.699423  | 0.669201  | -0.394563 |
| H | -0.517454 | 0.955566  | 1.829589  |
| H | -0.631911 | -0.790146 | 1.954292  |
| H | 1.996273  | 0.817268  | 1.855399  |
| H | 1.203357  | 0.236171  | 3.316359  |
| H | 2.996916  | -1.243085 | 2.907842  |
| H | 1.531994  | -2.143390 | 2.497562  |
| H | -0.284369 | -1.981995 | -0.303493 |
| H | 2.073452  | -1.641981 | 0.268105  |

Optimized Cartesian Geometries Calculated by MPW1PW91/6-311+G(2d,p)

EG1

|   |          |           |           |
|---|----------|-----------|-----------|
| C | 0.007637 | -0.003420 | 0.007760  |
| C | 0.001544 | 0.001711  | 1.515790  |
| O | 1.369522 | -0.002108 | -0.396726 |
| O | 0.633804 | 1.148048  | 2.036125  |

|   |           |           |           |
|---|-----------|-----------|-----------|
| H | -0.512272 | -0.894381 | -0.364564 |
| H | -0.507015 | 0.889544  | -0.362928 |
| H | -1.027186 | 0.008284  | 1.879616  |
| H | 0.485694  | -0.912857 | 1.881662  |
| H | 1.425414  | 0.231770  | -1.324167 |
| H | 1.488193  | 1.212154  | 1.598474  |

PD1

|   |           |           |           |
|---|-----------|-----------|-----------|
| C | 0.009080  | -0.009542 | 0.008213  |
| C | 0.005968  | -0.005751 | 1.521297  |
| C | 1.398561  | -0.000427 | 2.134122  |
| O | 0.667060  | -1.190459 | -0.445982 |
| O | 2.079275  | -1.226259 | 1.987459  |
| H | -1.017513 | 0.018652  | -0.373702 |
| H | 0.535126  | 0.878838  | -0.362780 |
| H | -0.533572 | 0.887544  | 1.851616  |
| H | -0.546720 | -0.874429 | 1.889999  |
| H | 1.984557  | 0.825233  | 1.702447  |
| H | 1.328083  | 0.184386  | 3.207897  |
| H | 0.766558  | -1.150823 | -1.398782 |
| H | 1.948265  | -1.512694 | 1.076388  |

BD1

|   |           |           |           |
|---|-----------|-----------|-----------|
| C | 0.011261  | -0.010651 | 0.008232  |
| C | 0.008245  | -0.008723 | 1.522731  |
| C | 1.366951  | -0.003573 | 2.225629  |
| C | 2.168235  | -1.297678 | 2.184646  |
| O | 0.377021  | -1.303006 | -0.475992 |
| O | 2.743176  | -1.586813 | 0.933024  |
| H | -0.991815 | 0.236184  | -0.354784 |
| H | 0.708733  | 0.745516  | -0.370467 |
| H | -0.536435 | 0.890204  | 1.827568  |
| H | -0.590721 | -0.859002 | 1.866118  |

|   |          |           |           |
|---|----------|-----------|-----------|
| H | 1.989428 | 0.803736  | 1.825004  |
| H | 1.191516 | 0.235502  | 3.280072  |
| H | 3.001158 | -1.217417 | 2.886397  |
| H | 1.538109 | -2.131000 | 2.528715  |
| H | 0.377025 | -1.287641 | -1.435477 |
| H | 2.016573 | -1.667913 | 0.297993  |

Optimized Cartesian Geometries Calculated by M062X/6-311+G(2df,2p)

EG1

|   |           |           |           |
|---|-----------|-----------|-----------|
| C | 0.000984  | -0.001657 | -0.000358 |
| C | -0.001080 | 0.001106  | 1.510695  |
| O | 1.364021  | 0.006852  | -0.397000 |
| O | 0.626954  | 1.154919  | 2.018820  |
| H | -0.513004 | -0.891960 | -0.375607 |
| H | -0.513990 | 0.891274  | -0.365752 |
| H | -1.025753 | 0.000539  | 1.881296  |
| H | 0.496143  | -0.906477 | 1.870149  |
| H | 1.431526  | 0.194338  | -1.333769 |
| H | 1.484721  | 1.222928  | 1.589410  |

PD1

|   |           |           |           |
|---|-----------|-----------|-----------|
| C | -0.005578 | 0.002727  | -0.002408 |
| C | -0.001089 | 0.002643  | 1.513379  |
| C | 1.404520  | -0.004463 | 2.104498  |
| O | 0.686808  | -1.157162 | -0.454123 |
| O | 2.040167  | -1.258764 | 2.003133  |
| H | -1.031584 | 0.001811  | -0.380576 |
| H | 0.495832  | 0.904147  | -0.371182 |
| H | -0.533216 | 0.894505  | 1.851912  |
| H | -0.544401 | -0.869393 | 1.883143  |
| H | 2.005723  | 0.778358  | 1.622473  |
| H | 1.359163  | 0.228701  | 3.168157  |
| H | 0.740999  | -1.152531 | -1.410921 |

|     |           |           |           |
|-----|-----------|-----------|-----------|
| H   | 1.935715  | -1.564024 | 1.096536  |
| BD1 |           |           |           |
| C   | 0.013281  | -0.011626 | 0.001888  |
| C   | -0.004597 | 0.017260  | 1.519679  |
| C   | 1.356385  | -0.000256 | 2.219305  |
| C   | 2.183026  | -1.270702 | 2.056568  |
| O   | 0.293610  | -1.339149 | -0.442231 |
| O   | 2.783313  | -1.394500 | 0.786770  |
| H   | -0.963921 | 0.295041  | -0.378869 |
| H   | 0.768517  | 0.681613  | -0.382606 |
| H   | -0.528851 | 0.928540  | 1.815915  |
| H   | -0.615335 | -0.821980 | 1.863858  |
| H   | 1.960211  | 0.843465  | 1.873992  |
| H   | 1.182542  | 0.151664  | 3.287727  |
| H   | 3.001283  | -1.255599 | 2.776974  |
| H   | 1.563726  | -2.147815 | 2.281886  |
| H   | 0.190795  | -1.385296 | -1.394654 |
| H   | 2.079052  | -1.575390 | 0.153926  |

Optimized Cartesian Geometries Calculated by MP2/6-311++G(3df,3pd)

EG1

|   |           |           |           |
|---|-----------|-----------|-----------|
| C | -0.289499 | -0.633382 | -0.693897 |
| C | 0.297321  | -0.602555 | 0.695740  |
| O | 0.170672  | 0.550009  | -1.342582 |
| O | -0.159115 | 0.522408  | 1.421446  |
| H | 0.048727  | -1.527241 | -1.223998 |
| H | -1.379217 | -0.639586 | -0.629546 |
| H | -0.014328 | -1.485986 | 1.249045  |
| H | 1.388547  | -0.603779 | 0.621797  |
| H | -0.328747 | 0.675849  | -2.151303 |
| H | 0.008370  | 1.285778  | 0.860219  |

PD1

|     |           |           |           |
|-----|-----------|-----------|-----------|
| C   | -0.186628 | -0.484690 | -1.310038 |
| C   | 0.355159  | -1.068960 | -0.023101 |
| C   | -0.306943 | -0.486032 | 1.217593  |
| O   | 0.059219  | 0.924355  | -1.297876 |
| O   | 0.110674  | 0.836852  | 1.497383  |
| H   | 0.300748  | -0.943562 | -2.172867 |
| H   | -1.261493 | -0.675807 | -1.376287 |
| H   | 0.184741  | -2.147373 | -0.048125 |
| H   | 1.431264  | -0.900752 | 0.033869  |
| H   | -1.396796 | -0.534578 | 1.102414  |
| H   | -0.042444 | -1.077675 | 2.092156  |
| H   | -0.330741 | 1.313553  | -2.083526 |
| H   | 0.067296  | 1.315558  | 0.662402  |
| BD1 |           |           |           |
| C   | 0.136660  | -0.365761 | -1.590009 |
| C   | 1.226625  | 0.216099  | -0.711329 |
| C   | 1.218454  | -0.203601 | 0.759192  |
| C   | 0.073929  | 0.335445  | 1.607316  |
| O   | -1.096283 | 0.315255  | -1.324133 |
| O   | -1.167017 | -0.294273 | 1.356204  |
| H   | 0.401756  | -0.225668 | -2.639443 |
| H   | 0.024919  | -1.435888 | -1.396554 |
| H   | 2.178346  | -0.093402 | -1.148483 |
| H   | 1.183355  | 1.305057  | -0.792216 |
| H   | 1.217013  | -1.293818 | 0.833080  |
| H   | 2.152217  | 0.144982  | 1.208064  |
| H   | 0.294621  | 0.152244  | 2.657854  |
| H   | -0.004115 | 1.420281  | 1.469817  |
| H   | -1.766102 | -0.024510 | -1.922811 |
| H   | -1.401787 | -0.070012 | 0.445030  |
